# Supplementary material for: Persistent growth of anthropogenic non-methane volatile organic compound (NMVOC) emissions in China during 1990–2017: drivers, speciation and ozone formation potential
Source: Copernicus journal article supplement (doi:10.5194/acp-19-8897-2019), 2019-07-12
Supplement: Supplementary file 2 [file TableS1_VOC_trend_Li et al.xlsx]

## Sheet: TableS1
	Table S1
	Sector	Subsector	Source	Source profilesa	Activity rate	Reference	Unabated emission factor	Unit	Reference	Control measuresb
	power	power	raw coal	1178, Shi et al., 2015	fuel consumption	Liu et al., 2015	0.025	g kg-1	EPA, 1995
		power	cleaned coal	1178, Shi et al., 2015	fuel consumption	Liu et al., 2015	0.025	g kg-1	EPA, 1995
		power	other washed coal	1178, Shi et al., 2015	fuel consumption	Liu et al., 2015	0.025	g kg-1	EPA, 1995
		power	briquettes	1178, Shi et al., 2015	fuel consumption	Liu et al., 2015	0.025	g kg-1	EPA, 1995
		power	diesel oil	2	fuel consumption	NBS, 1992-2017	0.109	g kg-1	EPA, 1995
		power	fuel oil	5647	fuel consumption	NBS, 1992-2017	0.109	g kg-1	EPA, 1995
		power	LPG	4	fuel consumption	NBS, 1992-2017	0.12	g kg-1	EEA, 2016
		power	NG	3, 1001	fuel consumption	NBS, 1992-2017	0.1392	g m-3	EPA, 1995
	industry	chemical industry	flat glass	1185, Liu et al.,2008	production	NBS, 1990-2017	0.1	g kg-1	EPA, 1995	install VOC emission control facility
		chemical industry	glass products	1185, Liu et al.,2008	production	NBS, 1990-2017	3.65	g kg-1	EPA, 1995	install VOC emission control facility
		chemical industry	NG production	8949	production	NBS, 1992-2017	0.343	g m-3	EEA, 2016	install VOC emission control facility
		chemical industry	NG distribution	8950	NG distribution	NBS, 1992-2017	0.1	g m-3	EEA, 2016	install VOC emission control facility
		chemical industry	carbon black	1002	production	China Rubber Industry Association, 2011-2017; China Petroleum and Chemical Industry Federation, 1990-2017	0.7	g kg-1	EEA, 2016	install VOC emission control facility
		chemical industry	pulp	8783, 8789, 7101, 7102, 7103	production	China National Light Industry Council, 1990-2017	2	g kg-1	EEA, 2016	install VOC emission control facility
		chemical industry	varnish paint production	7105, 1094	production	China Coating Industry Association, 1997-2018	15	g kg-1	EPA, 1995	install VOC emission control facility
		chemical industry	architechture paint prodcution	7105, 1094	production	China Coating Industry Association, 1997-2018; China Petroleum and Chemical Industry Federation, 1990-2017	15	g kg-1	EPA, 1995	install VOC emission control facility
		chemical industry	printing ink production	72	production	NBS, 1990-2017	43	g kg-1	EEA, 2016	install VOC emission control facility
		chemical industry	glue production	2423	production	CCPIT, 2017	11	g kg-1	EEA, 2016	install VOC emission control facility
		chemical industry	asphalt production	Liu et al.,2008	production	China National Petroleum Corporation, 1996-2017	2.516	g kg-1	EPA, 1995	install VOC emission control facility
		chemical industry	rubber	1008	production	NBS, 1990-2017; NBS, 1990-2017	8	g kg-1	EEA, 2016	install VOC emission control facility
		chemical industry	tyres	272, 273, 274	production	NBS, 1990-2017; NBS, 1990-2017; NBS, 1990-2017	0.16	kg tyre-1	EEA, 2016	install VOC emission control facility
		chemical industry	polystyrene	1004, Hsu et al.,2007	production	China Plastic Procesing Industry Association, 2002-2017	12.74	g kg-1	EEA, 2016	install VOC emission control facility
		chemical industry	ethylene	2461	production	NBS, 1990-2017	0.6	g kg-1	EEA, 2016	install VOC emission control facility
		chemical industry	LDPE	2547	production	China National Petroleum Corporation, 1996-2017; China Petroleum and Chemical Industry Federation, 1990-2017; China Plastics Processing Industry Association, 2002-2017; Development Research Center of the State Council, 1990-2015	2.4	g kg-1	EEA, 2016	install VOC emission control facility
		chemical industry	HDPE	2547	production	China National Petroleum Corporation, 1996-2017; China Petroleum and Chemical Industry Federation, 1990-2017; China Plastics Processing Industry Association, 2002-2017; Development Research Center of the State Council, 1990-2015	2.3	g kg-1	EEA, 2016	install VOC emission control facility
		chemical industry	PVC	1091	production	China National Petroleum Corporation, 1996-2017; China Petroleum and Chemical Industry Federation, 1990-2017	4.3	g kg-1	EEA, 2016, EPA, 1995	install VOC emission control facility
		chemical industry	poly'prop	68, Mo et al.,2015	production	China National Petroleum Corporation, 1996-2017; China Petroleum and Chemical Industry Federation, 1990-2017	4	g kg-1	EEA, 2016	install VOC emission control facility
		chemical industry	synthetic fiber	1092	production	NBS, 1990-2017	10	g kg-1	EPA, 1995	install VOC emission control facility
		chemical industry	wool	1095, 1096	production	NBS, 1990-2017; NBS, 1990-2017; NBS, 1990-2017	10	g kg-1	EEA, 2016	install VOC emission control facility
		chemical industry	silk	1095, 1096	production	NBS, 1990-2017; NBS, 2000-2015	10	g kg-1	EEA, 2016	install VOC emission control facility
		chemical industry	cloth	1095, 1096	production	NBS, 1990-2017	23	g kg-1	EPA, 1995	install VOC emission control facility
		industrial coal use	raw coal	1178, 1185, Liu et al.,2008, Shi et al.,2015	fuel consumption	NBS, 1992-2017	0.025 for heating; 1.776 for industrial boiler	g kg-1	EPA, 1995; EEA, 2016	eliminate small coal-fired boilers
		industrial coal use	cleaned coal	1178, 1185, Liu et al.,2008, Shi et al.,2015	fuel consumption	NBS, 1992-2017	0.025 for heating; 1.776 for industrial boiler	g kg-1	EPA, 1995; EEA, 2016	eliminate small coal-fired boilers
		industrial coal use	other washed coal	1178, 1185, Liu et al.,2008, Shi et al.,2015	fuel consumption	NBS, 1992-2017	0.025 for heating; 1.776 for industrial boiler	g kg-1	EPA, 1995; EEA, 2016	eliminate small coal-fired boilers
		industrial coal use	briquettes	1178, 1185, Liu et al.,2008, Shi et al.,2015	fuel consumption	NBS, 1992-2017	0.025 for heating; 1.776 for industrial boiler	g kg-1	EPA, 1995; EEA, 2016	eliminate small coal-fired boilers
		industrial coal use	coke	1178, 1185, Liu et al.,2008, Shi et al.,2015	fuel consumption	NBS, 1992-2017	0.06	g kg-1	EPA, 1995	eliminate small coal-fired boilers
		industrial coal use	cement coal use	1185, Liu et al.,2008	fuel consumption	NBS, 1992-2017	1.776	g kg-1	EEA, 2016	eliminate small coal-fired boilers
		industrial coal use	lime coal use	1185, Liu et al.,2008	fuel consumption	NBS, 1992-2017	1.776	g kg-1	EEA, 2016	eliminate small coal-fired boilers
		industrial coal use	brick coal use	1185, Liu et al.,2008	fuel consumption	NBS, 1992-2017	1.776	g kg-1	EEA, 2016	eliminate small coal-fired boilers
		industrial coal use	synthetic ammonia by coal	7128, 7129, 7136, 7149	fuel consumption	NBS, 1990-2017; NBS, 1990-2017	4.72	g kg-1	EPA, 1995	eliminate small coal-fired boilers
		industrial other fuel combustion	fuel oil	5647	fuel consumption	NBS, 1992-2017	0.109	g kg-1	EPA, 1995	install VOC emission control facility
		industrial other fuel combustion	LPG	4	fuel consumption	NBS, 1992-2017	0.0875 for residential heating plants; 0.12 for industrial boiler and industrial heating	g kg-1	EEA, 2016	install VOC emission control facility
		industrial other fuel combustion	NG	3	fuel consumption	NBS, 1992-2017	0.1392	g m-3	EPA, 1995	install VOC emission control facility
		industrial other fuel combustion	coke oven gas	5	fuel consumption	NBS, 1992-2017	0.0038	g m-3	EEA, 2016	install VOC emission control facility
		industrial other fuel combustion	other gas	5	fuel consumption	NBS, 1992-2017	0.001045	g m-3	EEA, 2016	install VOC emission control facility
		oil production distribution and refinery	crude oil production	1207, 1212	oil production	NBS, 1992-2017	0.2	g kg-1	EEA, 2016	emission standard of GB 11085-89
		oil production distribution and refinery	crude oil handle	296, 1208, 2487	oil handling	NBS, 1990-2017	0.2	g kg-1	EEA, 2016	emission standard of GB 11085-89
		oil production distribution and refinery	oil refinery	Liu et al.,2008	crude oil input	NBS, 1992-2017	2.76	g kg-1	EEA, 2016	emission standard of GB 11085-89
		oil production distribution and refinery	oil depot-gasoline	Liu et al.,2008, Zhang et al.,2013, Wu et al.,2015	gasoline distribution	NBS, 1992-2017	2.3	g kg-1	GB 11085-89	emission standard of GB 20951-2007
		oil production distribution and refinery	oil depot-diesel	Liu et al.,2008	diesel distribution	NBS, 1992-2017	0.002	g kg-1	EPA, 1995	emission standard of GB 11085-89
		oil production distribution and refinery	oil station-gasoline	Zhang et al.,2013	gasoline refueling	NBS, 1992-2017	4.03	g kg-1	EEA, 2016	emission standard of GB 20952-2007
		oil production distribution and refinery	oil station-diesel	Zhang et al.,2013	diesel refueling	NBS, 1992-2017	0	g kg-1	EPA, 1995	emission standard of GB 11085-89
		other industrial process	sintering, iron and steel	13, Tsai et al.,2008	production	NBS, 1990-2017	0.138 for sintering; 0.027, 0.027 for OHF and BOF, 0.046 for EAF for steel production	g kg-1	EEA, 2016	install VOC emission control facility
		other industrial process	coke	Shi et al.,2015	production	NBS, 1992-2017, NBS, 1990-2017	1.55,	g kg-1	He, 2006, EPA, 1995	emission standard of GB 16171-2012
		other industrial process	cake	8538	production	China National Food Industry Association, 1992-2018	1	g kg-1	EEA, 2016	install VOC emission control facility
		other industrial process	biscuit	8538	production	China National Food Industry Association, 1992-2018	1	g kg-1	EEA, 2016	install VOC emission control facility
		other industrial process	sugar	8538	production	NBS, 1990-2017	10	g kg-1	EEA, 2016	install VOC emission control facility
		other industrial process	beer	1070, 1071	production	NBS, 1990-2017	0.35	g kg-1	EEA, 2016	install VOC emission control facility
		other industrial process	wine	1070, 1071	production	China National Light Industry Council, 1990-2017; NBS, 1990-2017	0.7	g kg-1	EPA, 1995	install VOC emission control facility
		chemical industry	spirits	1070, 1071	production	China National Association For Liquor and Spirits, 2003-2011; China National Food Industry Association, 1992-2018	19.81	g kg-1	EPA, 1995	install VOC emission control facility
	residential	residential biofuel combustion	wood	Tsai et al.,2003, Liu et al.,2008, Wang et al.,2009	fuel consumption	NBS, 1992-2017	10.18 for traditional stove, 5.94 for improved stove	g kg-1	EEA, 2016
		residential biofuel combustion	crop residual	Tsai et al.,2003, Wang et al.,2009, Mo et al.,2016	fuel consumption	NBS, 1992-2017	9.29 for traditional stove, 5.42 for improved stove	g kg-1	EEA, 2016
		residential coal combustion	raw coal	1185, Tsai et al.,2003, Liu et al.,2008, Mo et al.,2016	fuel consumption	NBS, 1992-2017	0.46 for auto grate boiler, 3.48 for hand-feed boiler, 5.0 for stoves	g kg-1	EEA, 2016; EPA, 1995; Tsai et al., 2003	replace with electricity and natural gas
		residential coal combustion	other washed coal	1185, Tsai et al.,2003, Liu et al.,2008, Mo et al.,2016	fuel consumption	NBS, 1992-2017	0.46 for auto grate boiler, 3.48 for hand-feed boiler, 5.0 for stoves	g kg-1	EEA, 2016; EPA, 1995; Tsai et al., 2003	replace with electricity and natural gas
		residential coal combustion	briquettes	1185, Tsai et al.,2003, Liu et al.,2008, Mo et al.,2016	fuel consumption	NBS, 1992-2017	0.46 for auto grate boiler, 3.48 for hand-feed boiler, 5.0 for stoves	g kg-1	EEA, 2016; EPA, 1995; Tsai et al., 2003	replace with electricity and natural gas
		residential other fuel combustion	LPG	Tsai et al., ,2003	fuel consumption	NBS, 1992-2017	0.083	g kg-1	EEA, 2016
		residential other fuel combustion	NG	Tsai et al., ,2003	fuel consumption	NBS, 1992-2017	0.1392	g m-3	EPA, 1995
		waste treatment	fill	202, 3002	amount of waste	MOHURD, 2007-2017; NBS, 1993-2017; NBS, 1990-2017	1.56	g kg-1	EEA, 2016
		waste treatment	incinaration	122	amount of waste	NBS, 1999-2018; MOHURD, 2007-2017; NBS, 1990-2017	0.02	g kg-1	EEA, 2016
	solvent use	industrial paint use	architechture interior wall coating	Wang et al.,2014	solvent used	China Coating Industry Association, 1997-2018; China Petroleum and Chemical Industry Federation, 1990-2017	180 for waterborne, 620 for solvent-based	g kg-1	Wei et al., 2009	strengthen emission standards; increase proportions of waterborne paint
		industrial paint use	architechture other paint	Liu et al.,2008	solvent used	China Coating Industry Association, 1997-2018; China Petroleum and Chemical Industry Federation, 1990-2017	300 for waterborne, 620 for solvent-based	g kg-1	Wei et al., 2009	strengthen emission standards; increase proportions of waterborne paint
		industrial paint use	new car varnish paint	Yuan et al.,2010	solvent used	China Coating Industry Association, 1997-2018; China Petroleum and Chemical Industry Federation, 1990-2017	50 for waterborne, 730 for solvent-based	g kg-1	Wei et al., 2009	strengthen emission standards; increase proportions of waterborne paint
		industrial paint use	vehicle refurnish paint	Wang et al.,2014	solvent used	China Coating Industry Association, 1997-2018; China Petroleum and Chemical Industry Federation, 1990-2017	150 for waterborne, 750 for solvent-based	g kg-1	Wei et al., 2009	strengthen emission standards; increase proportions of waterborne paint
		industrial paint use	decorations wood	Yuan et al.,2010	solvent used	China Coating Industry Association, 1997-2018; China Petroleum and Chemical Industry Federation, 1990-2017	225 for waterborne, 660 for solvent-based	g kg-1	Wei et al., 2009	strengthen emission standards; increase proportions of waterborne paint
		industrial paint use	wood furniture	Zheng et al.,2013	solvent used	China Coating Industry Association, 1997-2018; China Petroleum and Chemical Industry Federation, 1990-2017	225 for waterborne, 660 for solvent-based	g kg-1	Wei et al., 2009	strengthen emission standards; increase proportions of waterborne paint
		industrial paint use	other industry paint	1013	solvent used	China Coating Industry Association, 1997-2018; China Petroleum and Chemical Industry Federation, 1990-2017	440	g kg-1	EEA, 2016	strengthen emission standards
		solvent use other thant paint	printing ink	Yuan et al.,2010, Zheng et al.,2013, Wang et al.,2014	solvent used	NBS, 1990-2017	540	g kg-1	EPA, 1995	strengthen emission standards
		solvent use other thant paint	printing cleaning gasoline solvent	Liu et al.,2008	solvent used	NBS, 1990-2017	1000	g kg-1	EPA, 1995
		solvent use other thant paint	passenger vehicle treated-dewax	1194	vehicle ownership	China Association of Automobile Manufactures, 1991-2016	1	kg vehicle-1	EEA, 2016
		solvent use other thant paint	passenger vehicle treated-reseal	1194	vehicle ownership	China Association of Automobile Manufactures, 1991-2016	0.2	kg vehicle-1	EEA, 2016
		solvent use other thant paint	wood production treatment	2404	solvent used	National Forestry and Grassland Administration, 1999-2017; NBS, 1990-2017; NBS, 1990-2017; NBS, 2000-2015	0.5	kg m-3	EPA, 1995
		solvent use other thant paint	pharmaceutical production	3040, 3144	solvent used	NBS, 1990-2017; NBS, 1990-2017	300	g kg-1	EEA, 2016
		solvent use other thant paint	pesticide use	76, 3001	solvent used	NBS, 1990-2017	425.36	g kg-1	EPA, 1995
		solvent use other thant paint	domestic solvent	197	population	NBS, 1991-2017	0.5 for urban, 0.1 for rural	kg capita-1	EEA, 2016	strengthen emission standards
		solvent use other thant paint	dry clean C2Cl4 usage	1193, 85	solvent used	China Petroleum and Chemical Industry Federation, 1990-2017	177	g kg-1	EEA, 2016
		solvent use other thant paint	glue use	1020, 1088, 2423, 3004, 3005, 3006, 3007, 3008, 3009, 3010, 3011, 3012, 3013, 3142, 8523, 8524, 8525	solvent used	CCPIT, 2017	66	g kg-1	EEA, 2016
	transportation	onroad diesel	heavy duty truck	4674, 8775, Schauer et al.,1999, Mo et al.,2016	diesel fuel	NBS, 2000-2015; NBS, 1990-2017; Zheng et al., 2014	0.02~2.71	g km-1	Zheng et al., 2014	emission standards of Euro I~Euro V; retire old vehicles
		onroad diesel	medium duty truck	4674, 8775, Schauer et al.,1999, Mo et al.,2016	diesel fuel	NBS, 2000-2015; NBS, 1990-2017; Zheng et al., 2014	0.01~1.76	g km-1	Zheng et al., 2014	emission standards of Euro I~Euro V; retire old vehicles
		onroad diesel	light duty truck	1201, Liu et al.,2008, Tsai et al.,2012	diesel fuel	NBS, 2000-2015; NBS, 1990-2017; Zheng et al., 2014	0.01~2.96	g km-1	Zheng et al., 2014	emission standards of Euro I~Euro V; retire old vehicles
		onroad diesel	mini truck	1201, Liu et al.,2008, Tsai et al.,2012	diesel fuel	NBS, 2000-2015; NBS, 1990-2017; Zheng et al., 2014	0.02~0.98	g km-1	Zheng et al., 2014	emission standards of Euro I~Euro V; retire old vehicles
		onroad diesel	heavy duty bus	4674, 8775, Schauer et al.,1999, Mo et al.,2016	diesel fuel	NBS, 2000-2015; NBS, 1990-2017; Zheng et al., 2014	0.02~2.71	g km-1	Zheng et al., 2014	emission standards of Euro I~Euro V; retire old vehicles
		onroad diesel	medium duty bus	4674, 8775, Schauer et al.,1999, Mo et al.,2016	diesel fuel	NBS, 2000-2015; NBS, 1990-2017; Zheng et al., 2014	0.01~1.76	g km-1	Zheng et al., 2014	emission standards of Euro I~Euro V; retire old vehicles
		onroad diesel	light duty bus	1201, Liu et al.,2008, Tsai et al.,2012	diesel fuel	NBS, 2000-2015; NBS, 1990-2017; Zheng et al., 2014	0.02~0.98	g km-1	Zheng et al., 2014	emission standards of Euro I~Euro V; retire old vehicles
		onroad gasoline	heavy duty truck	1186, Schauer et al.,2002	gasoline fuel	NBS, 2000-2015; NBS, 1990-2017; Zheng et al., 2014	2.74~7.69	g km-1	Zheng et al., 2014	emission standards of Euro I~Euro IV; retire old vehicles
		onroad gasoline	medium duty truck	1186, Schauer et al.,2002	gasoline fuel	NBS, 2000-2015; NBS, 1990-2017; Zheng et al., 2014	2.28~6.40	g km-1	Zheng et al., 2014	emission standards of Euro I~Euro V; retire old vehicles
		onroad gasoline	light duty truck	4557, 1203, 8756, 6001, Duffy et al.,1999, Schauer et al.,2002, Liu et al.,2008, Wang et al.,2013, Dai et al.,2013	gasoline fuel	NBS, 2000-2015; NBS, 1990-2017; Zheng et al., 2014	1.66~5.63	g km-1	Zheng et al., 2014	emission standards of Euro I~Euro V; retire old vehicles
		onroad gasoline	mini truck	4557, 1203, 8756, 6001, Duffy et al.,1999, Schauer et al.,2002, Liu et al.,2008, Wang et al.,2013, Dai et al.,2013	gasoline fuel	NBS, 2000-2015; NBS, 1990-2017; Zheng et al., 2014	0.01~3.63	g km-1	Zheng et al., 2014	emission standards of Euro I~Euro V; retire old vehicles
		onroad gasoline	heavy duty bus	1186, Schauer et al.,2002	gasoline fuel	NBS, 2000-2015; NBS, 1990-2017; Zheng et al., 2014	2.74~7.69	g km-1	Zheng et al., 2014	emission standards of Euro I~Euro IV; retire old vehicles
		onroad gasoline	medium duty bus	1186, Schauer et al.,2002	gasoline fuel	NBS, 2000-2015; NBS, 1990-2017; Zheng et al., 2014	2.28~6.40	g km-1	Zheng et al., 2014	emission standards of Euro I~Euro V; retire old vehicles
		onroad gasoline	light duty bus	4557, 1203, 8756, 6001, Duffy et al.,1999, Schauer et al.,2002, Liu et al.,2008, Wang et al.,2013, Dai et al.,2013	gasoline fuel	NBS, 2000-2015; NBS, 1990-2017; Zheng et al., 2014	0.01~3.63	g km-1	Zheng et al., 2014	emission standards of Euro I~Euro V; retire old vehicles
		onroad gasoline	mini bus	4557, 1203, 8756, 6001, Duffy et al.,1999, Schauer et al.,2002, Liu et al.,2008, Wang et al.,2013, Dai et al.,2013	gasoline fuel	NBS, 2000-2015; NBS, 1990-2017; Zheng et al., 2014	0.01~2.90	g km-1	Zheng et al., 2014	emission standards of Euro I~Euro V; retire old vehicles
		onroad gasoline	motorcycle	Liu et al.,2008, Yao et al.,2013	gasoline fuel	NBS, 2000-2015; NBS, 1990-2017; Zheng et al., 2014	0.47~2.72	g km-1	Zheng et al., 2014	emission standards of Euro1~Euro III
		onroad gasoline	evaporatation	Liu et al.,2008	gasoline fuel	NBS, 2000-2015; NBS, 1990-2017; Zheng et al., 2014	0.01~0.31	g km-1	Zheng et al., 2014	emission standards of Euro I~Euro V; retire old vehicles
		offroad diesel	locomotive	95331, 95332, 95333	diesel fuel	China Transportation & Communications Yearbook Editorial Board, 1991-2015	3.542	g kg-1	EEA, 2016
		offroad diesel	in-land waterway	5677, 5678	diesel fuel	China Transportation & Communications Yearbook Editorial Board, 1991-2015	3.542	g kg-1	EEA, 2016
		offroad diesel	3-wheelers	Yao et al.,2015	diesel fuel	China Association of Automobile Manufactures, 1991-2016	3.542	g kg-1	EEA, 2016
		offroad diesel	low-speed truck	Yao et al.,2015	diesel fuel	China Association of Automobile Manufactures, 1991-2016	3.542	g kg-1	EEA, 2016
		offroad diesel	agricultural machinery	95331, 95332, 95333	diesel fuel	Ministry of Agriculture and Rural Affairs of the People's Republic of China, 1991-2017	3.542	g kg-1	EEA, 2016
		offroad diesel	construction machinery	95331, 95332, 95333	diesel fuel	NBS, 1993-2017	3.377	g kg-1	EEA, 2016
	a The numbers represent “P_NUMBER” of profiles in the SPECIATE v4.5 database.
	b NMVOC-related control measures, as of 2017.
	Reference
	Dai, P., Ge, Y., Lin, Y., Su, S., and Liang, B.: Investigation on characteristics of exhaust and evaporative emissions from passenger cars fueled with gasoline/methanol blends, Fuel, 113, 10-16, https://doi.org/10.1016/j.fuel.2013.05.038, 2013.
	China Association of Automobile Manufactures: China Automotive Industry Yearbook (1991, 1993, 1994, 1995, 1996, 1997, 1998, 1999, 2000, 2001, 2002, 2003, 2004, 2005, 2006, 2007, 2008, 2009, 2010, 2011, 2012, 2013, 2014, 2015, 2016 editions), China Association of Automobile Manufactures, Beijing, China, 1991-2016.
	China Coating Industry Association: China Paint and Coatings Industry Annual (1991-1995, 1996-1998, 1999-2000, 2001, 2002, 2003, 2004, 2005, 2006, 2007, 2008, 2009, 2010, 2011, 2012, 2013, 2014, 2015, 2016, 2017 edition), China Coating Industry Association, Beijing, China, 1997-2018.
	China Council for the Promotion of International Trade (CCPIT), Analysis of China's Adhensive Industry Market, Demand, Import and Export in 2017, 2017.
	China National Association For Liquor and Spirits: China Sugar & Liquor Yearbook (2003, 2004, 2005, 2006, 2007, 2008, 2009, 2010, 2011 edition), China Economic and Cultural Publishing House, Beijing, China, 2003-2011.
	China National Food Industry Association: China Food Industry Yearbook (1991, 1992, 1993-1996, 1997, 1998, 1999, 2000, 2001, 2002, 2003, 2004, 2005, 2006, 2008, 2009, 2010, 2011-2013, 2014, 2015, 2016, 2017 edition), China Statistics Press, Beijing, China, 1992-2018.
	China National Light Industry Council: China Light Industry Yearbook (1990, 1991, 1992, 1993, 1994, 1995, 1996, 1997, 1998, 1999, 2000, 2001, 2002, 2003, 2004, 2005, 2006, 2007, 2008, 2009, 2010, 2011, 2012, 2013, 2014, 2015, 2016, 2017 edition), China National Light Industry Council, Beijing, China, 1990-2017.
	China National Petroleum Corporation: China National Petroleum Corporation Yearbook (1996, 1997, 1998, 1999, 2000, 2001, 2002, 2003, 2004, 2005, 2006, 2007, 2008, 2009, 2010, 2011, 2012, 2013, 2014, 2015, 2016, 2017 edition), Petroleum Industry Press, Beijing, China, 1996-2017.
	China Petroleum and Chemical Industry Federation: China Chemical Industry Yearbook (1990, 1991, 1992, 1992-1993, 1993-1994, 1994-1995, 1995-1996, 1996-1997, 1997-1998, 1998-1999, 1999-2000, 2000-2001, 2001-2002, 2002-2003, 2003-2004, 2004-2005, 2005-2006, 2007, 2008, 2009, 2010, 2011-2012, 2013, 2014, 2015, 2016 edition), China National Chemical Information Center Co., Ltd., Beijing, China, 1990-…
	China Plastics Processing Industry Association: China Plastics Industry Yearbook (2001, 2002, 2003, 2004, 2005, 2006, 2007, 2008, 2009, 2010, 2011, 2012, 2013, 2014, 2015, 2016, 2017 edition), China National Light Industry Press, Beijing, China, 2002-2017.
	China Rubber Industry Association: China Rubber Industry Yearbook (2001, 2002, 2003, 2004, 2005, 2006, 2007-2008, 2008-2009, 2009-2010, 2010-2011, 2011-2012, 2012-2013, 2013-2014, 2014-2015, 2015-2016, 2016-2017 edition), China Commercial Publishing House, Beijing, China, 2011-2017.
	China Transportation & Communications Yearbook Editorial Board: China Transportation & Communications Yearbook (1991, 1992, 1993, 1994, 1995, 1996, 1997, 1998, 1999, 2000, 2002, 2004, 2005, 2006, 2007, 2008, 2009, 2010, 2011, 2012, 2013, 2014, 2015 editions), China Communications Press, Beijing, China, 1991-2015.
	Development Research Center of the State Council: China Economy Yearbook (1990, 1991, 1992, 1993, 1994, 1995, 1996, 1997, 1998, 1999, 2000, 2001, 2002, 2003, 2004, 2005, 2006, 2008, 2009, 2010, 2011, 2012, 2013, 2014 2015 edition), China Economy Yearbook Editorial Board, Beijing, China, 1990-2015.
	Duffy, B. L., Nelson, P. F., Ye, Y., and Weeks, I. A.: Speciated hydrocarbon profiles and calculated reactivities of exhaust and evaporative emissions from 82 in-use light-duty Australian vehicles, Atmospheric Environment, 33, 291-307, https://doi.org/10.1016/S1352-2310(98)00163-0, 1999.
	Environmental Protection Agency (EPA): Compilation of air pollu- tant emission factors (AP42), Fifth Edition, Chapter 1–13, 1995.
	European Environment Agency (EEA), EMEP/CORINAIR Emission Inventory Guidebook - 2016, 2016.
	GB 11085-89, Loss of bulk petroleum liquid products, 1989.
	He, Q.: Characteristics, emission factors and emission estimation for particulate matters and volatile organic compounds emitted from coke production in China (in Chinese), Ph.D thesis, Guangzhou Institute of Geochemistry, Chinese Academy of Sciences, Guangzhou, 2006.
	Hsu, Y.-C., Chen, S.-K., Tsai, J.-H., and Chiang, H.-L.: Determination of Volatile Organic Profiles and Photochemical Potentials from Chemical Manufacture Process Vents, Journal of the Air & Waste Management Association, 57, 698-704, 10.3155/1047-3289.57.6.698, 2007.
	Liu, F., Zhang, Q., Tong, D., Zheng, B., Li, M., Huo, H., and He, K. B.: High-resolution inventory of technologies, activities, and emissions of coal-fired power plants in China from 1990 to 2010, Atmos. Chem. Phys., 15, 13299-13317, 10.5194/acp-15-13299-2015, 2015.
	Liu, Y., Shao, M., Fu, L., Lu, S., Zeng, L., and Tang, D.: Source profiles of volatile organic compounds (VOCs) measured in China: Part I, Atmospheric Environment, 42, 6247-6260, https://doi.org/10.1016/j.atmosenv.2008.01.070, 2008.
	Liu, Y., Shao, M., Fu, L., Lu, S., Zeng, L., and Tang, D.: Source profiles of volatile organic compounds (VOCs) measured in China: Part I, Atmospheric Environment, 42, 6247-6260, https://doi.org/10.1016/j.atmosenv.2008.01.070, 2008.
	Ministry of Agriculture and Rural Affairs of the People's Republic of China: China Agriculture Statistical Report (1990, 1991, 1992, 1993, 1994, 1995, 1996, 1997, 1998, 1999, 2000, 2001, 2002, 2003, 2004, 2005, 2006, 2007, 2008, 2009, 2010, 2011, 2012, 2013, 2014, 2015, 2016 edition), China Agriculture Press, Beijing, China, 1991-2017.
	Ministry of Housing and Urban-Rural Development of the People's Republic of China (MOHURD): China Urban Construction Statistical Yearbook (2006, 2007, 2008, 2009, 2010, 2011, 2012, 2013, 2014, 2015, 2016 edition), China Statistics Press, Beijing, China, 2007-2017.
	Mo, Z., Shao, M., and Lu, S.: Compilation of a source profile database for hydrocarbon and OVOC emissions in China, Atmospheric Environment, 143, 209-217, http://dx.doi.org/10.1016/j.atmosenv.2016.08.025, 2016.
	Mo, Z., Shao, M., Lu, S., Qu, H., Zhou, M., Sun, J., and Gou, B.: Process-specific emission characteristics of volatile organic compounds (VOCs) from petrochemical facilities in the Yangtze River Delta, China, Science of The Total Environment, 533, 422-431, https://doi.org/10.1016/j.scitotenv.2015.06.089, 2015.
	National Bureau of Statistics (NBS), available at http://data.stats.gov.cn/, 1990-2017.
	National Bureau of Statistics (NBS): China Energy Statistical Yearbook (1991, 1991-1996, 1997-1999, 2000-2002, 2004, 2005, 2006, 2007, 2008, 2009, 2010, 2011, 2012, 2013, 2014, 2015, 2016, 2017 editions), China Statistics Press, Beijing, China, 1992-2017.
	National Bureau of Statistics (NBS): China Industry Economy Statistical Yearbook (1990, 1991, 1992, 1993, 1994, 1995, 1996, 1997, 1998, 1999, 2000, 2001, 2002, 2003, 2004, 2005, 2006, 2007, 2008, 2009, 2010, 2011, 2012, 2013, 2014, 2015, 2016, 2017 edition), China Statistics Press, Beijing, China, 1990-2017.
	National Bureau of Statistics (NBS): China Population & Employment Statistics Yearbook (1990, 1991, 1992, 1993, 1994, 1995, 1996, 1997, 1998, 1999, 2000, 2001, 2002, 2003, 2004, 2005, 2006, 2007, 2008, 2009, 2010, 2011, 2012, 2013, 2014, 2015, 2016, 2017 edition), China Statistics Press, Beijing, China, 1991-2017.
	National Bureau of Statistics (NBS): China Statistical Yearbook (1990, 1991, 1992, 1993, 1994, 1995, 1996, 1997, 1998, 1999, 2000, 2001, 2002, 2003, 2004, 2005, 2006, 2007, 2008, 2009, 2010, 2011, 2012, 2013, 2014, 2015, 2016, 2017 edition), China Statistics Press, Beijing, China, 1990-2017.
	National Bureau of Statistics (NBS): China Statistical Yearbook for Regional Economy (2000, 2001, 2002, 2003, 2004, 2005, 2006, 2008, 2009, 2010, 2011, 2012, 2013, 2014 edition), China Statistics Press, Beijing, China, 2000-2015.
	National Bureau of Statistics (NBS): China Statistical Yearbook on Construction (1990-1991, 1996, 1997, 1998, 1999, 2001, 2002, 2003, 2004, 2005, 2006, 2007, 2008, 2009, 2010, 2011, 2012, 2013, 2014, 2015, 2016, 2017 editions), China Statistics Press, Beijing, China, 1993-2017.
	National Bureau of Statistics (NBS): China Statistical Yearbook on Environment (1998, 2005, 2006, 2007, 2008, 2009, 2010, 2011, 2012, 2013, 2014, 2015, 2016, 2017 editions), China Statistics Press, Beijing, China, 1999-2018.
	National Bureau of Statistics (NBS): China Trade and External Economic Statistical Yearbook (1990, 1991, 1992, 1993, 1994, 1995, 1996, 1997, 1998, 1999, 2000, 2001, 2002, 2003, 2004, 2005, 2006, 2007, 2008, 2009, 2010, 2011, 2012, 2013, 2014, 2015, 2016, 2017 edition), China Statistics Press, Beijing, China, 1990-2017.
	National Forestry and Grassland Administration: China Forestry Statistical Yearbook (1998, 1999, 2000, 2001, 2002, 2003, 2004, 2005, 2006, 2007, 2008, 2009, 2010, 2011, 2012, 2013, 2014, 2015, 2016 editions), China Forestry Publishing House, Beijing, China, 1999-2017.
	Schauer, J. J., Kleeman, M. J., Cass, G. R., and Simoneit, B. R. T.: Measurement of Emissions from Air Pollution Sources. 2. C1 through C30 Organic Compounds from Medium Duty Diesel Trucks, Environmental Science & Technology, 33, 1578-1587, 10.1021/es980081n, 1999.
	Schauer, J. J., Kleeman, M. J., Cass, G. R., and Simoneit, B. R. T.: Measurement of Emissions from Air Pollution Sources. 5. C1−C32 Organic Compounds from Gasoline-Powered Motor Vehicles, Environmental Science & Technology, 36, 1169-1180, 10.1021/es0108077, 2002.
	Shi, J., Deng, H., Bai, Z., Kong, S., Wang, X., Hao, J., Han, X., and Ning, P.: Emission and profile characteristic of volatile organic compounds emitted from coke production, iron smelt, heating station and power plant in Liaoning Province, China, Science of The Total Environment, 515-516, 101-108, https://doi.org/10.1016/j.scitotenv.2015.02.034, 2015.
	Tsai, J.-H., Chang, S.-Y., and Chiang, H.-L.: Volatile organic compounds from the exhaust of light-duty diesel vehicles, Atmospheric Environment, 61, 499-506, https://doi.org/10.1016/j.atmosenv.2012.07.078, 2012.
	Tsai, J.-H., Lin, K.-H., Chen, C.-Y., Lai, N., Ma, S.-Y., and Chiang, H.-L.: Volatile organic compound constituents from an integrated iron and steel facility, Journal of Hazardous Materials, 157, 569-578, https://doi.org/10.1016/j.jhazmat.2008.01.022, 2008.
	Tsai, S. M., Zhang, J., Smith, K. R., Ma, Y., Rasmussen, R. A., and Khalil, M. A. K.: Characterization of Non-methane Hydrocarbons Emitted from Various Cookstoves Used in China, Environmental Science & Technology, 37, 2869-2877, 10.1021/es026232a, 2003.
	Wang, H., Qiao, Y., Chen, C., Lu, J., Dai, H., Qiao, L., Lou, S., Huang, C., Li, L., Jing, S., and Wu, J.: Source Profiles and Chemical Reactivity of Volatile Organic Compounds from Solvent Use in Shanghai, China, Aerosol and Air Quality Research, 14, 301-310, 10.4209/aaqr.2013.03.0064, 2014.
	Wang, J., Jin, L., Gao, J., Shi, J., Zhao, Y., Liu, S., Jin, T., Bai, Z., and Wu, C.-Y.: Investigation of speciated VOC in gasoline vehicular exhaust under ECE and EUDC test cycles, Science of The Total Environment, 445-446, 110-116, https://doi.org/10.1016/j.scitotenv.2012.12.044, 2013.
	Wang, S., Wei, W., Du, L., Li, G., and Hao, J.: Characteristics of gaseous pollutants from biofuel-stoves in rural China, Atmospheric Environment, 43, 4148-4154, http://dx.doi.org/10.1016/j.atmosenv.2009.05.040, 2009.
	Wei, W., Wang, S., and Hao, J.: Estimation and forcast of volatile organic compounds emitted from paint uses in China, Environmental Science, 30, 2809-2815, 2009.
	Wu, Y., Yang, Y.-D., Shao, M., and Lu, S.-H.: Missing in total OH reactivity of VOCs from gasoline evaporation, Chinese Chemical Letters, 26, 1246-1248, https://doi.org/10.1016/j.cclet.2015.05.047, 2015.
	Yao, Y.-C., Tsai, J.-H., and Wang, I. T.: Emissions of gaseous pollutant from motorcycle powered by ethanol–gasoline blend, Applied Energy, 102, 93-100, https://doi.org/10.1016/j.apenergy.2012.07.041, 2013.
	Yao, Z., Wu, B., Shen, X., Cao, X., Jiang, X., Ye, Y., and He, K.: On-road emission characteristics of VOCs from rural vehicles and their ozone formation potential in Beijing, China, Atmospheric Environment, 105, 91-96, https://doi.org/10.1016/j.atmosenv.2015.01.054, 2015.
	Yuan, B., Shao, M., Lu, S., and Wang, B.: Source profiles of volatile organic compounds associated with solvent use in Beijing, China, Atmospheric Environment, 44, 1919-1926, http://dx.doi.org/10.1016/j.atmosenv.2010.02.014, 2010.
	Zhang, Y., Wang, X., Zhang, Z., Lü, S., Shao, M., Lee, F. S. C., and Yu, J.: Species profiles and normalized reactivity of volatile organic compounds from gasoline evaporation in China, Atmospheric Environment, 79, 110-118, http://dx.doi.org/10.1016/j.atmosenv.2013.06.029, 2013.
	Zheng, B., Huo, H., Zhang, Q., Yao, Z. L., Wang, X. T., Yang, X. F., Liu, H., and He, K. B.: High-resolution mapping of vehicle emissions in China in 2008, Atmos. Chem. Phys., 14, 9787-9805, 10.5194/acp-14-9787-2014, 2014.
	Zheng, B., Huo, H., Zhang, Q., Yao, Z. L., Wang, X. T., Yang, X. F., Liu, H., and He, K. B.: High-resolution mapping of vehicle emissions in China in 2008, Atmos. Chem. Phys., 14, 9787-9805, 10.5194/acp-14-9787-2014, 2014.
	Zheng, J., Yu, Y., Mo, Z., Zhang, Z., Wang, X., Yin, S., Peng, K., Yang, Y., Feng, X., and Cai, H.: Industrial sector-based volatile organic compound (VOC) source profiles measured in manufacturing facilities in the Pearl River Delta, China, Science of The Total Environment, 456-457, 127-136, https://doi.org/10.1016/j.scitotenv.2013.03.055, 2013.
