# Supplementary material for: Persistent growth of anthropogenic non-methane volatile organic compound (NMVOC) emissions in China during 1990–2017: drivers, speciation and ozone formation potential
Source: Copernicus journal article supplement (doi:10.5194/acp-19-8897-2019), 2019-07-12
Supplement: Supplementary file [file acp-19-8897-2019-supplement-title-page.pdf › acp-19-8897-2019-supplement-title-page.pdf]

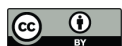

## *Supplement of*

# **Persistent growth of anthropogenic non-methane volatile organic compound (NMVOC) emissions in China during 1990–2017: drivers, speciation and ozone formation potential**

**Meng Li et al.**

*Correspondence to:* Qiang Zhang ([qiangzhang@tsinghua.edu.cn](mailto:qiangzhang@tsinghua.edu.cn)) and Yuxuan Zhang ([yuxuan.zhang@mpic.de](mailto:yuxuan.zhang@mpic.de))

- [acp-19-8897-2019-supplement-title-page.pdf](#)
- SI
  - [SI\\_VOC\\_trend\\_Li et al.docx](#)
  - [TableS1\\_VOC\\_trend\\_Li et al.xlsx](#)

The copyright of individual parts of the supplement might differ from the CC BY 4.0 License.
